# Supplementary material
Source: publisher figshare collection journal article supplement (https://tandf.figshare.com/ndownloader/files/17458118)
Supplement: Supplementary file 1 [file 17458118]

*Appendix.* Stimuli Used in the Experiment

| **Color name** | **Condition** | | | |
| --- | --- | --- | --- | --- |
| **Phonologically-related** | **Phonologically-unrelated** | **Orthographically-related** | **Orthographically -unrelated** |
| 红(red, hong2) | 松鼠(squirrel, song1shu3) | 蛋糕(cake, dan4gao) | 线轴 (cotton reel, xian4zhou2) | 杯子 (cup, bei1zi) |
| 红(red | 公路(road, gong1lu4) | 风筝(kite, feng1zheng) | 绵羊 (sheep, mian2yang2) | 梳子 (comb, shu1zi) |
| 红(red, hong2) | 钟(clock, zhong1) | 灯泡(lightbulb, deng1pao4) | 纺车 (spinning wheel, fang3che1) | 枕头 (pillow, zhen3tou2) |
| 蓝 (blue, lan2) | 帆船(sailboat, fan1chuan2) | 松鼠(squirrel, song1shu3) | 花生 (peanut, hua1sheng1) | 橡皮 (rubber, xiang4pi2) |
| 蓝 (blue, lan2) | 盘子(plate, pan2zi) | 公路(road, gong1lu4) | 花瓶 (vase, hua1ping2) | 椅子 (chair, yi3zi) |
| 蓝 (blue, lan2) | 蛋糕(cake, dan4gao) | 钟(clock, zhong1) | 苍蝇 (fly, cang1ying) | 柜子 (cupboard, gui4zi) |
| 橙 (orange, cheng2) | 绳子(rope, sheng2zi) | 孔雀(peacock, kong3que4) | 杯子 (cup, bei1zi) | 花生 (peanut, hua1sheng1) |
| 橙 (orange, cheng2) | 风筝(kite, feng1zheng) | 恐龙(dinosaur, kong3long2) | 梳子 (comb, shu1zi) | 花瓶 (vase, hua1ping2) |
| 橙 (orange, cheng2) | 灯泡(lightbulb, deng1pao4) | 公鸡(rooster, gong1ji1) | 椅子 (chair, yi3zi) | 苍蝇 (fly, cang1ying) |
| 棕 (brown, zong1) | 孔雀(peacock, kong3que4) | 帆船(sailboat, fan1chuan2) | 橡皮 (rubber, xiang4pi2) | 线轴 (cotton reel, xian4zhou2) |
| 棕 (brown, zong1) | 恐龙(dinosaur, kong3long2) | 盘子(plate, pan2zi) | 枕头 (pillow, zhen3tou2) | 绵羊 (sheep, mian2yang2) |
| 棕 (brown, zong1) | 公鸡(rooster, gong1ji1) | 绳子(rope, cheng2zi) | 柜子 (cupboard, gui4zi) | 纺车 (spinning wheel, fang3che1) |
